# Supplementary material
Source: publisher figshare collection journal article supplement (https://karger.figshare.com/ndownloader/files/30610296)
Supplement: Supplementary file 1 [file 30610296]

**Supplementary Fig. 1**. Kaplan-Meier estimation curve of the HEA resolution, which designated those who enrolled in OIT and those who were lost to follow up to have continued with elimination of HE. HEA, hen's egg allergy; HE, hen's egg.
